# Supplementary material
Source: Research Square preprint supplement (doi:10.21203/rs.3.rs-9762116/v1)
Supplement: Supplementary file 1 [file 43cad0221bdcd25cf7b7eef0.docx]

**Nurses’ Knowledge Regarding Cardiopulmonary Resuscitation in Rangpur Medical college Hospital,Rangpur**

**Informed Consent Form**

Dear Respondent,

I am Md Fahim islam , 4th year (6th batch) student of B.Sc in Nursing

(Basic), Rangpur Community Nursing College, Rangpur. I am conducting research to

assess “Nurses’ Knowledge Regarding Cardiopulmonary Resuscitation in Rangpur Medical college Hospital,Rangpur”. The aim of the study is to justify the Nurses Knowledge Regarding Cardiopulmonary Resuscitation. If you agree to participate in the project, you will be interviewed with a questionnaire. Please give me your answers as accurately as you can.

There will be no risks to your participation in the project on the contrary; you

may gain some important information related to your activities and better

understand about Cardiopulmonary Resuscitation. All information and your responses in connection with the study will remain confidential. Neither your name nor any identification will be revealed in the reports of the study. Your refusal or failure to comply will not result in any penalty or affect the quality of your service. You have the right to withdraw from the study any time you want without any problems prior to completion of data collection. There is no cost to participate in this study and no financial benefit. If you feel discomfort about participating in this study, please do not hesitate to tell me & contact my guide teacher Md. Mazbaul Hasan, nursing instructor, Rangpur Community Nursing College, Rangpur

Md Fahim islam

**Cell No:**

**E-mail:**

Thank you for your cooperation.

I have already read and understand all information and agree to participate in this

study.

**(Signature of the Researcher) (Signature of the Respondent)**

**Date: Date:**

# Appendix: Questionnaire

## Part A: Socio-Demographic Information

1. **Age**
   - 20–30 years
   - 31–40 years
   - 41–50 years
   - Above 50 years

## Gender

- - Male
  - Female
  - Prefer not to say

## Highest Educational Qualification

- - Diploma in Nursing
  - Bachelor’s Degree in Nursing
  - Postgraduate in Nursing
  - Other (specify):

## Years of Clinical Experience

- - Less than 1 year
  - 1–5 years
  - 6–10 years
  - More than 10 years

## Current Work Unit/Department

- - Emergency
  - CCU
  - Cardiology
  - Others:

## Have you received formal CPR training?

- - Yes
  - No

## When was your last CPR training?

- - Less than 6 months ago
  - 6 months–1 year ago
  - More than 1 year ago
  - Never attended CPR training

## Part B: Nurses’ Knowledge Regarding Cardiopulmonary Resuscitation

1. What is the correct chest compression rate for adults?
   - 80–100/min
   - 100–120/min
   - 120–140/min
   - 60–80/min
2. What is the recommended compression depth in adult CPR?
   - 1 inch
   - 2 inches
   - At least 2 inches (5 cm)
   - More than 3 inches
3. What should be the position of hands during adult chest compressions?
   - One hand over the sternum
   - Two fingers below the nipple line
   - Heel of one hand on the lower sternum
   - Heel of one hand over the center of the chest with the other hand on top
4. Which artery is used to check the pulse in an unconscious adult?
   - Brachial
   - Femoral
   - Carotid
   - Radial
5. What should you do if there is no pulse and the victim is not breathing?
   - Start rescue breathing only
   - Wait for a defibrillator
   - Start chest compressions immediately
   - Check for injuries first
6. What is the purpose of allowing full chest recoil between compressions?
   - It gives the rescuer a break
   - It allows the heart to refill with blood
   - It slows down the CPR process
   - It improves oxygen saturation
7. Which of the following is a sign of effective ventilation during rescue breathing?
   - Chest rise and fall
   - Gurgling sounds
   - Air escaping through the nose
   - No response
8. What should be avoided during rescue breathing?
   - Proper head tilt
   - Over-ventilation
   - Use of bag-valve mask
   - Mouth-to-mouth seal
9. If a foreign object is visible in the airway, what should you do?
   - Begin compressions
   - Attempt to remove it carefully
   - Start rescue breathing
   - Ignore it and continue CPR
10. What is the best surface for performing CPR?
    - A soft mattress
    - A firm, hard surface
    - A recliner chair
    - Any flat area
11. What is the most reliable indicator of effective CPR?
    - Loud chest sounds
    - Chest wall movement
    - Return of spontaneous circulation (ROSC)
    - Increased blood pressure

## Yes/No Questions

1. Should CPR be initiated before informing the doctor in emergencies? □ Yes □ No
2. Should 2-rescuer team switch roles after every 5 cycles of CPR? □ Yes □ No
3. Do rescue breaths make the chest visibly rise? □ Yes □ No
4. Is CPR recommended if the victim has a DNR (Do Not Resuscitate) order? □ Yes □

No

1. Is the compression to ventilation ratio for single rescuer 30:2? □ Yes □ No
2. Should CPR be done on every person in cardiac emergency? □ Yes □ No
3. Is proper hand placement essential for effective compressions? □ Yes □ No
4. Can CPR be stopped after the first AED shock is delivered? □ Yes □ No
5. Should chest compressions be fast and shallow to avoid injury? □ Yes □ No
6. Is the recovery position used for unconscious but breathing individuals?

□ Yes □ No

1. Is the goal of CPR to restore spontaneous circulation and breathing? □ Yes □ No
2. Do Nurses ethically responsible for initiating CPR in hospital settings when indicated?

□ Yes □ No

1. Should an AED be used as soon as it becomes available?

□ Yes □ No

1. Should chest compressions be interrupted as often as needed to check for ROSC? □ Yes
   - No
